CORRECTION

# Correction: Large carnivores under assault in Alaska

**William J. Ripple, Sterling D. Miller, John W. Schoen, Sanford P. Rabinowitch**

The Alaska Department of Fish and Game has asked *PLOS Biology* to clarify that the affiliation ‘Alaska Department of Fish and Game’ listed for co-authors Sterling D. Miller and John W. Schoen are for their former affiliations with that agency, prior to retirement 20 years ago, and that the viewpoints expressed in the article do not reflect the position of the Alaska Department of Fish and Game.

Similarly, co-author Sanford P. Rabinowitch is retired from the United States National Park Service and his co-authorship does not reflect the position of that agency.

The author byline and affiliations should read as follows:

William J. Ripple<sup>1</sup>, Sterling D. Miller<sup>2,¶a</sup>, John W. Schoen<sup>2,¶b</sup>, Sanford P. Rabinowitch<sup>3,¶b</sup>

**1** Global Trophic Cascades Program, Department of Forest Ecosystems and Society, Oregon State University, Corvallis, Oregon, United States of America, **2** Alaska Department of Fish and Game (ret.), Anchorage, Alaska, United States of America, **3** United States National Park Service (ret.), Anchorage, Alaska, United States of America

¶a Current address: Missoula, Montana, United States of America

¶b Current address: Anchorage, Alaska, United States of America

## Reference

1. Ripple WJ, Miller SD, Schoen JW, Rabinowitch SP (2019) Large carnivores under assault in Alaska. *PLOS Biology* 17(1): e3000090. <https://doi.org/10.1371/journal.pbio.3000090> PMID: 30645586

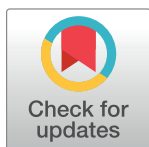

## OPEN ACCESS

**Citation:** Ripple WJ, Miller SD, Schoen JW, Rabinowitch SP (2019) Correction: Large carnivores under assault in Alaska. *PLoS Biol* 17(5): e3000282. <https://doi.org/10.1371/journal.pbio.3000282>

**Published:** May 22, 2019

**Copyright:** © 2019 Ripple et al. This is an open access article distributed under the terms of the [Creative Commons Attribution License](https://creativecommons.org/licenses/by/4.0/), which permits unrestricted use, distribution, and reproduction in any medium, provided the original author and source are credited.
